# Supplementary material
Source: MDPI journal article supplement (https://www.mdpi.com/2073-4344/12/10/1172)
Supplement: s1 [file s1 › catalysts-1900840-SI.pdf]

## SUPPLEMENTARY INFORMATION

### 1. STEM analysis of Ag-HMG

STEM analysis of Ag-HMG has been performed and its image is given as Figure S1. Ag nanoparticles are appeared as black dots with polymeric microgels. The size of nanoparticles is around 20-50 nm which correlates to the Zeta analysis results.

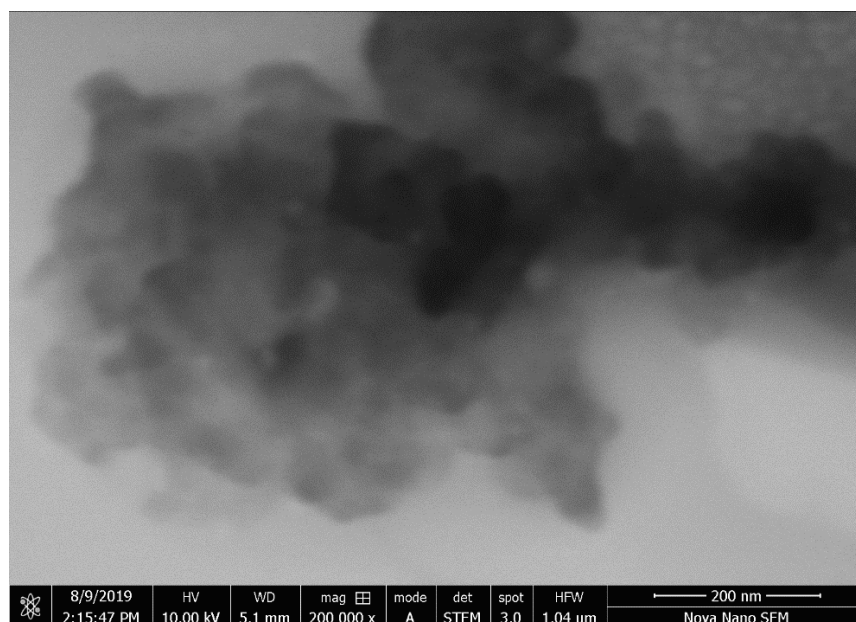

**Figure S1:** STEM analysis of Ag-HMG microgels.
